# Supplementary material for: Highly efficient catalytic reduction of bromate in water over a quasi-monodisperse, superparamagnetic Pd/Fe3O4 catalyst
Source: Royal Society of Chemistry journal article supplement (doi:10.1039/c3ta11455d), 2013-01-01
Supplement: c3ta11455d.pdf [file c3ta11455d.pdf]

Supporting Information

---

**Highly efficient catalytic reduction of bromate in water over a quasi-monodisperse,  
superparamagnetic Pd/Fe<sub>3</sub>O<sub>4</sub> catalyst**

Wuzhu Sun<sup>a,b</sup>, Qi Li<sup>a,\*</sup>, Shian Gao<sup>a</sup>, and Jian Ku Shang<sup>a,c</sup>

*<sup>a</sup>Environment Functional Materials Division*

*Shenyang National Laboratory for Materials Science*

*Institute of Metal Research, Chinese Academy of Sciences, Shenyang, 110016, P. R. China*

*<sup>b</sup>University of Science and Technology of China, Hefei, 230026, P. R. China*

*<sup>c</sup>Department of Materials Science and Engineering*

*University of Illinois at Urbana-Champaign, Urbana, IL 61801, USA*

\*Corresponding author e-mail: [qili@imr.ac.cn](mailto:qili@imr.ac.cn)

## Supporting Information

---

### Results and discussion

#### Reaction limitation examination in catalytic bromate reduction by Pd(x)/Fe<sub>3</sub>O<sub>4</sub> catalyst.

The effect of the hydrogen flow rate on the bromate conversion with the treatment time could be found in Figure S4a. It demonstrated that the hydrogen flow rate increase from 50 mL/min to 200 mL/min did not result in much change in the bromate reduction. The effect of the stirring speed on the bromate conversion with the treatment time could be found in Figure S4b, where the stirring speed increase from 200 rpm to 800 rpm did not change the bromate reduction much either. The little effect on bromate reduction from the hydrogen flow rate and the stirring speed indicated that the liquid/gas/solid mass transport limitation was not significant under the current experimental setup. The effect of the catalyst mass on the initial bromate conversion rate could be found in Figure S4c. It demonstrated that the initial bromate conversion rate was directly proportional to the catalyst weight ( $R^2 \sim 0.999$ ). This observation suggested that the chemical limitation played the major role for catalytic bromate reduction under the current experimental setup, and the internal mass transport could be ignored.

Supporting Information

Table S1 Characteristics of the bottled mineral water sample

| Component                       | Concentration (mg/L) |
|---------------------------------|----------------------|
| Ca <sup>2+</sup>                | 38.89                |
| Na <sup>+</sup>                 | 7.69                 |
| HCO <sub>3</sub> <sup>-</sup>   | 170.65               |
| Cl <sup>-</sup>                 | 0.69                 |
| Mg <sup>2+</sup>                | 10.81                |
| Si <sup>2+</sup>                | 0.17                 |
| K <sup>+</sup>                  | 0.35                 |
| H <sub>2</sub> SiO <sub>3</sub> | 26.65                |
| SO <sub>4</sub> <sup>2-</sup>   | 24.64                |
| pH                              | 7.77                 |

## Supporting Information

---

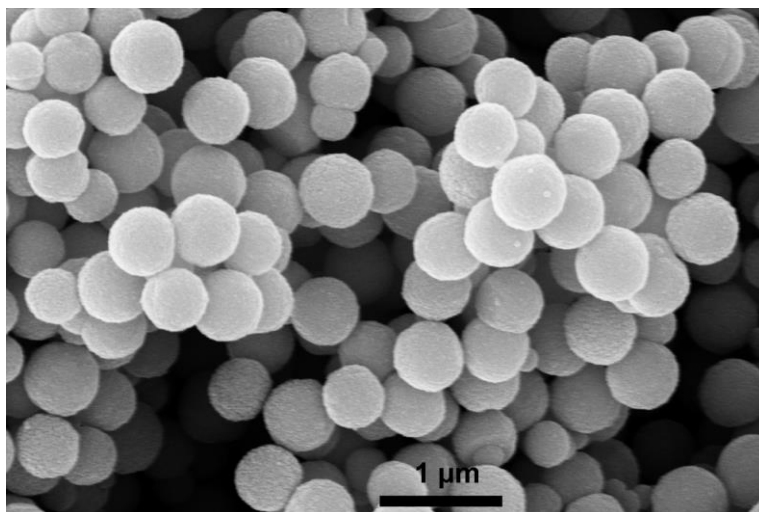

Figure S1. The SEM image of Fe<sub>3</sub>O<sub>4</sub> microspheres.

## Supporting Information

---

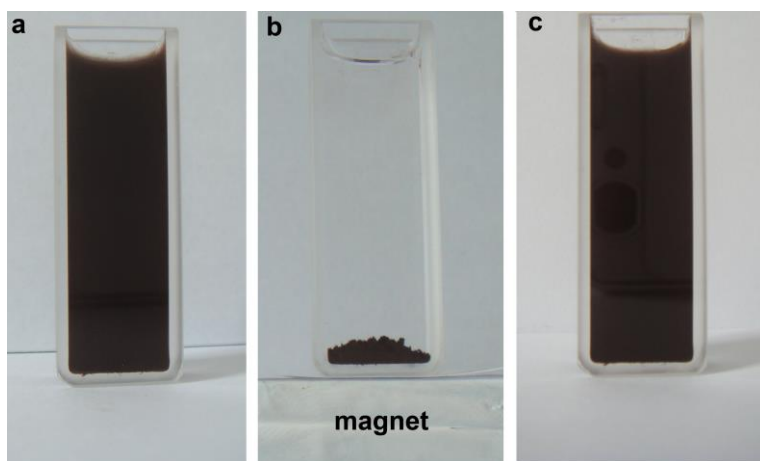

Figure S2. The digital photographs of Pd(0.1)/MFe<sub>3</sub>O<sub>4</sub> responding to external magnetic field: (a) without external magnetic field, (b) with external magnetic field, and (c) after the removal of external magnetic field.

## Supporting Information

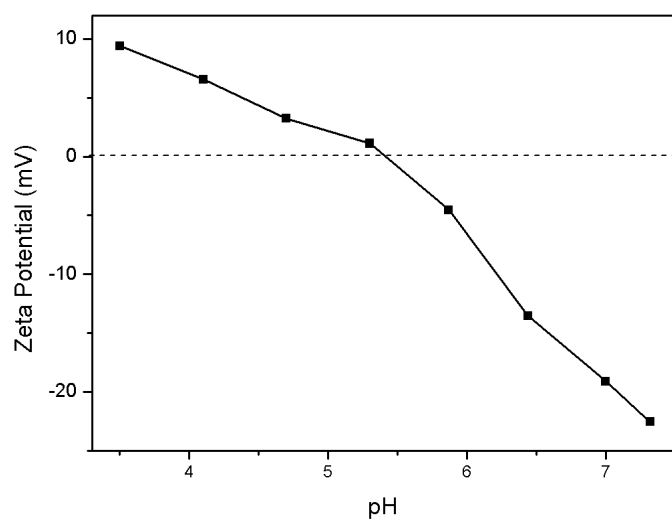

Figure S3. Zeta-potential measurement result of Pd(0.1)/Fe<sub>3</sub>O<sub>4</sub> catalyst at different pHs.

Supporting Information

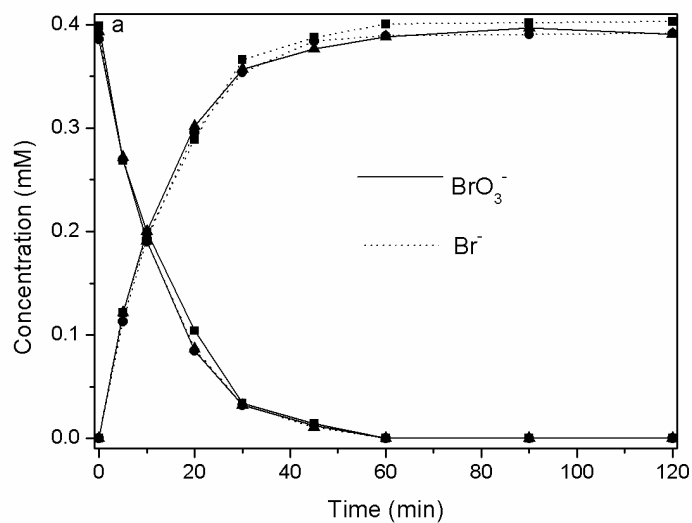

(a)

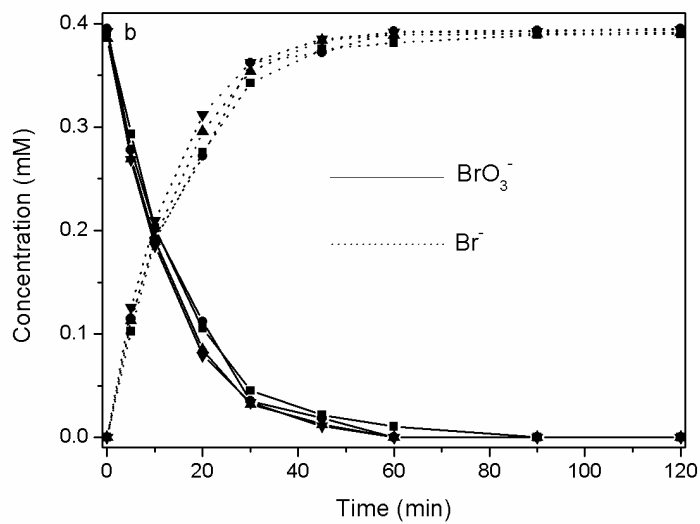

(b)

## Supporting Information

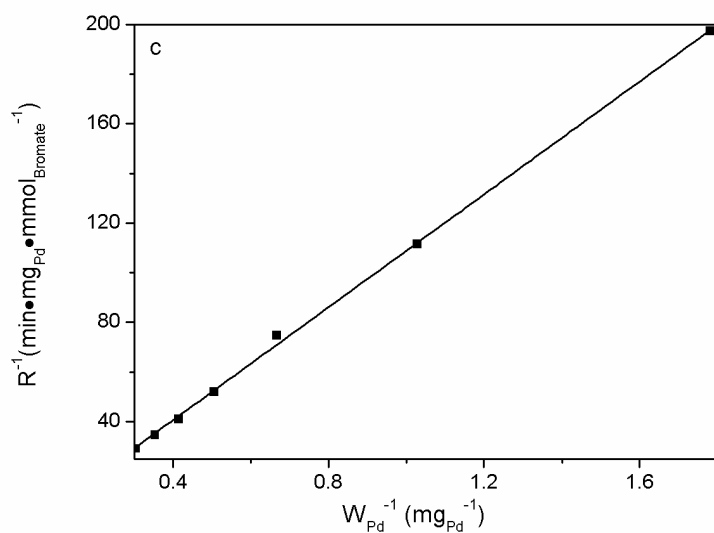

(c)

Figure S4. (a) The influence of  $H_2$  flow rate on bromate reduction (■ 50 mL/min, ▲ 100 mL/min, ● 200 mL/min). (b) The influence of stirring speed on the bromate reduction (■ 200r/min, ▲ 400 r/min, ▼ 600 r/min, ● 800 r/min). (c) The influence of Pd(0.1)/Fe<sub>3</sub>O<sub>4</sub> catalyst weight on the bromate reduction.

## Supporting Information

---

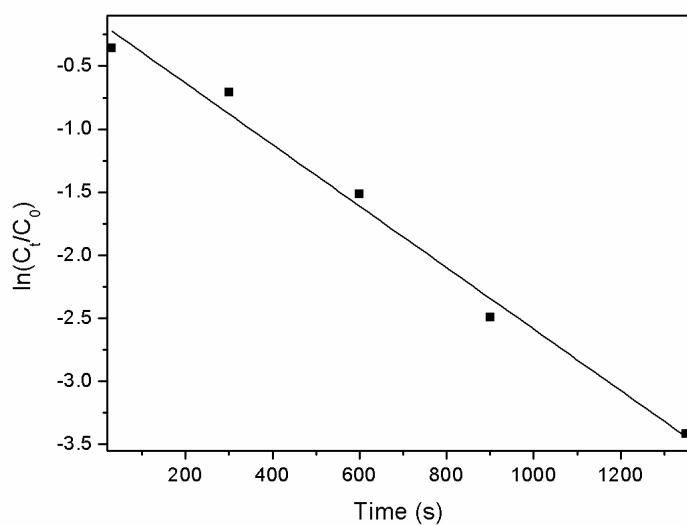

Figure S5. The catalytic bromate reduction data fitting curve by pseudo-first-order kinetic model.
